# Supplementary material
Source: Springer Nature journal article supplement (https://www.springermedizin.de/resource/supplementary/12998_2007_73_MOESM4_ESM.pdf/9623520)

Correct size  
20%

Too large  
10%

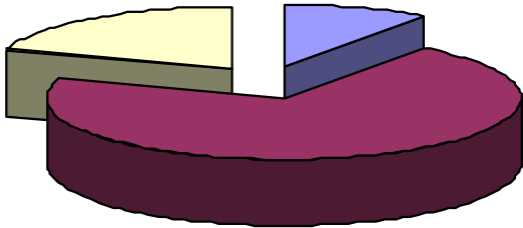

Too small  
70%

Supplement: MOESM4 [file 9623520]
